# Supplementary material
Source: PubMed Central journal article supplement (PMC2927968)
Supplement: NIHMS227858-supplement-1_si_001.pdf [file NIHMS227858-supplement-1_si_001.pdf]

## Hairpin DNA-functionalized gold colloids for the imaging of mRNA in live cells

*Ashwath Jayagopal, Kristin C. Halfpenny, Jonas W. Perez, David W. Wright*

Department of Chemistry, Vanderbilt University, Nashville, TN 37235

[david.wright@vanderbilt.edu](mailto:david.wright@vanderbilt.edu)

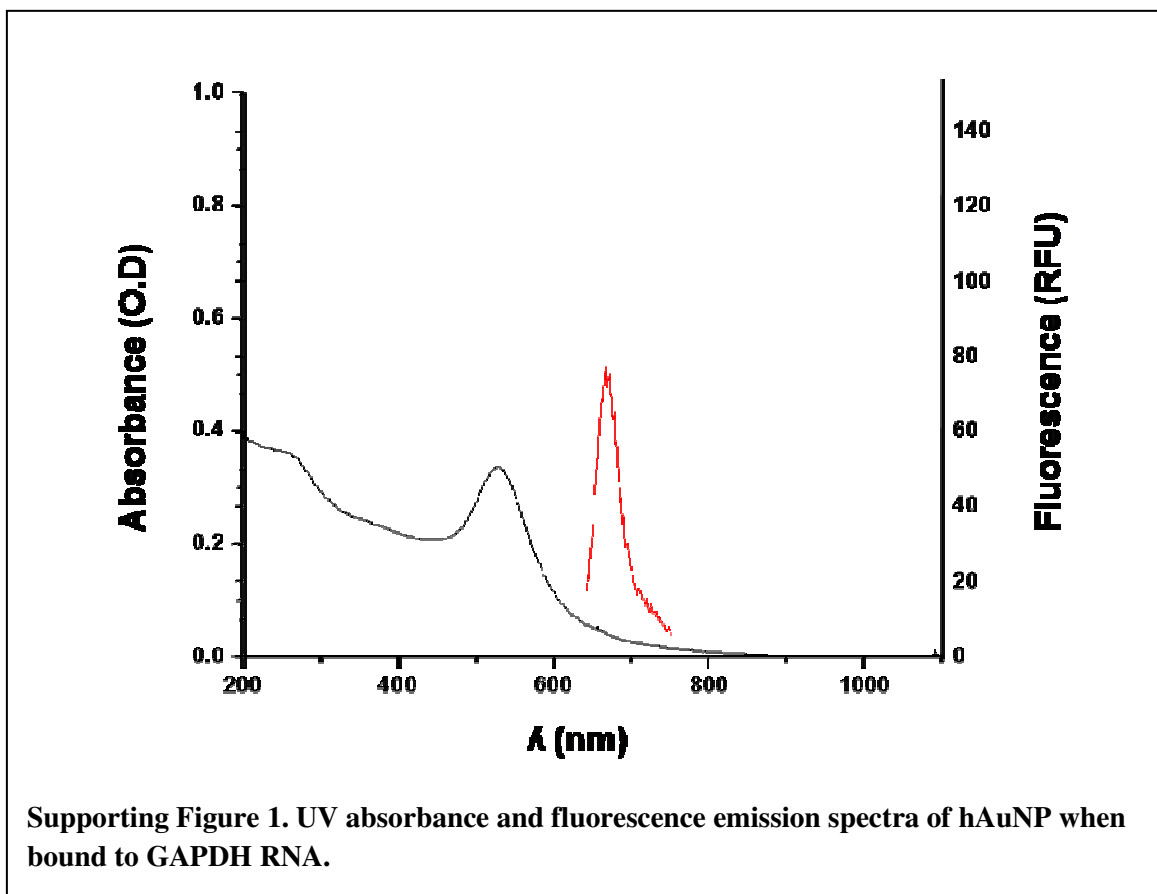

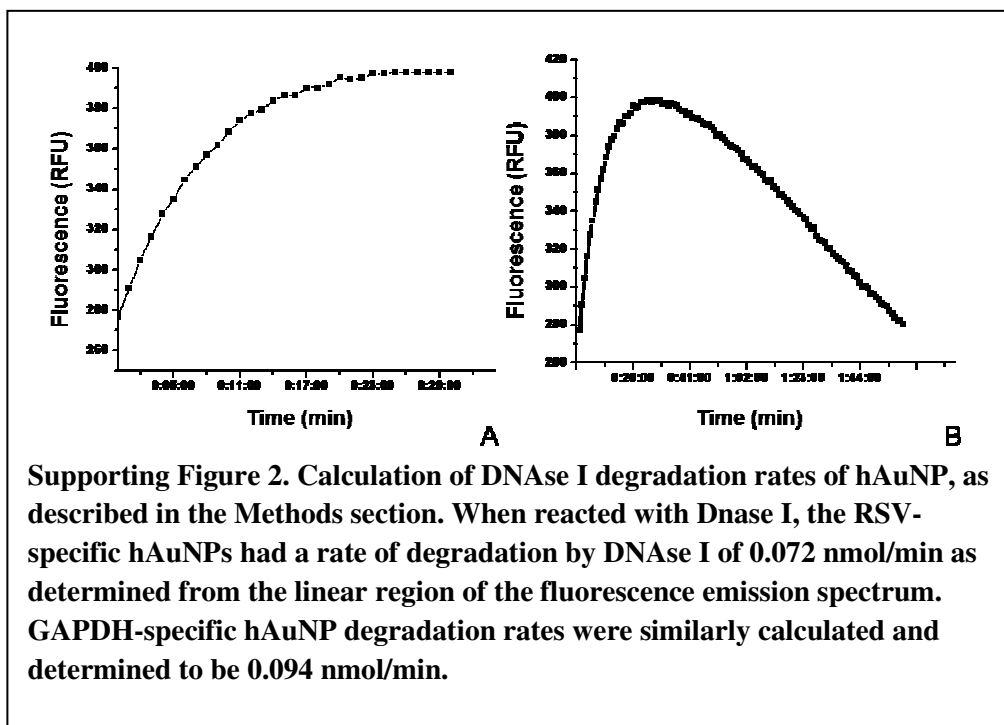

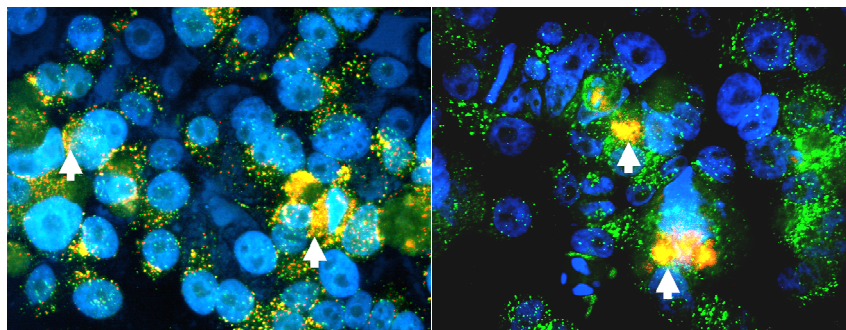

**Supplementary Figure 3. Representative confocal micrographs of hAuNP (red) and molecular beacons targeting GAPDH (green). Regions of probe intracellular colocalization are visible (arrowheads). Cy5 hAuNP-GAPDH were incubated with HEP-2 cells as detailed in the Methods section for a 6 hour period. After this period, molecular beacons functionalized with CAL FLUOR 590, a distinct fluorophore, were introduced into cells *via* a published technique using streptolysin O for cell permeabilization\*.**

\*- Santangelo PJ, Nitin N, Bao G. Direct visualization of mRNA colocalization with mitochondria in living cells using molecular beacons. *J Biomed Opt.* Jul-Aug 2005;10(4):44025.

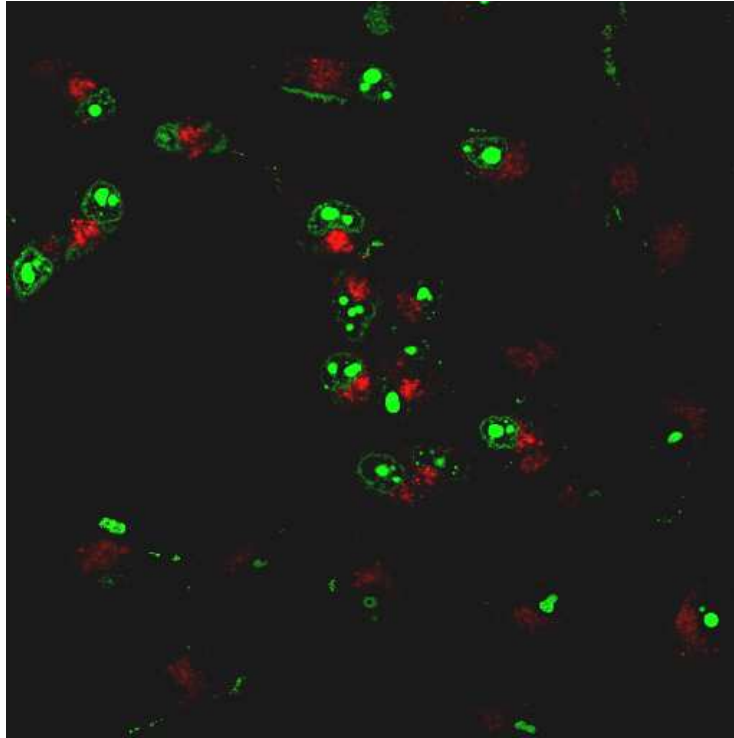

**Supplementary Figure 4. GAPDH-targeting hAuNP (red) do not penetrate the nuclear compartment (green) following intracellular translocation in HEp-2 cells, as indicated by lack of red and green colocalization. hAuNP were incubated with uninfected HEp-2 cells as described in the Methods section. Nuclei were labeled with SYTO-13.**
